# Supplementary material for: Cytogenetics-based Clinical Trajectories in Patients with MRD Negativity Post Autologous Transplant for Multiple Myeloma
Source: Research Square preprint supplement (doi:10.21203/rs.3.rs-8586124/v1), 2026-01-20
Supplement: Supplementary file 1 [file 0b849785b3823e6184df5a9e.docx]

***TABLE 2. Prevalence of HRCAs***

| Cytogenetic abnormality | n / N tested* | % | Isolated n/N tested* | Isolated % |
| --- | --- | --- | --- | --- |
| 1q21 gain/amplification | 139 / 350 | 39.7 | 78/350 | 22.3 |
| del(17p) | 55 / 351 | 15.7 | 23/351 | 6.6 |
| t(4;14) | 42 / 349 | 12.0 | 11/349 | 3.2 |
| MAF translocations [t(14;16) and/or t(14;20)] | 25 / 349 | 7.2 | 6/349 | 1.7 |
| del(1p) | 16 / 347 | 4.6 | 5/347 | 1.4 |

** Minor variation in denominators reflects differences in availability of individual FISH probes.*
