# Supplementary material for: Cytogenetics-based Clinical Trajectories in Patients with MRD Negativity Post Autologous Transplant for Multiple Myeloma
Source: Research Square preprint supplement (doi:10.21203/rs.3.rs-8586124/v1), 2026-01-20
Supplement: Supplementary file 2 [file 384edd9e4bb2b45955bc54e1.docx]

| *Table 1. Baseline characteristics of the study cohort and differences between standard risk vs high risk vs ultra-high-risk cohorts.* | | | | | |
| --- | --- | --- | --- | --- | --- |
| Characteristic | **Entire cohort with cytogenetics available n=351 (100%)** | **Standard risk n= 162 (46.2%)** | **High risk n=118 (33.6%)** | **Ultra-High-risk n=71 (20.2%)**  *2 HRCAs: 59 (17)*  *3 HRCAs: 12 (3)* | **p-value** |
| Age at diagnosis, years, median (IQR) | 62 (55–68) | 63 (54.8–68) | 63 (57–68) | 61 (55–68) | 0.80 |
| Gender, males (%) | 206 (58.7) | 104 (64.2%) | 69 (58.5%) | 33 (46.5%) | 0.04 |
| Race, n (%) |  |  |  |  | 0.70 |
| Black | 8 (2.3) | 3 (1.9) | 3 (2.5) | 2 (2.8) |  |
| White | 328 (93.5) | 152 (93.8) | 111 (94.1) | 65 (91.5) |  |
| Other | 15 (4.3) | 7 (4.3) | 4 (3.4) | 4 (5.6) |  |
| Time from diagnosis to ASCT, median (IQR), months | 6.09 (5.2–8.1) | 6.8 (5.2–8.3) | 6.0 (5.2–7.5) | 5.9 (5.2–7.1) | 0.34 |
| Age at ASCT, years, median (IQR) | 64.4 (55–70) | 64.6 (53–70) | 65.5 (59–71.9) | 63.02 (56–69) | 0.40 |
| Induction therapy, n (%) |  |  |  |  | 0.75 |
| Triplet (VRd, KRd) | 273 (77.8) | 129 (79.6) | 89 (75.4) | 55 (77.5) |  |
| Dara-based quadruplet | 37 (10.5) | 16 (9.9) | 13 (11) | 8 (11.3) |  |
| CyBorD | 30 (8.6) | 11 (6.8) | 13 (11) | 6 (8.5) |  |
| Doublet | 8 (2.3) | 5 (3.1) | 1 (0.8) | 2(2.8) |  |
| Other (DaraVD, VD-PACE) | 3 (0.9) | 1 (0.6) | 2 (1.7) |  |  |
| Post-Transplant therapy, n (%) | 345 (98.3) | 157 (96.9) | 117 (99.2) | 71 (100) | <0.0001 |
| Consolidation | 33 (9.6) | 1 (0.6) | 12 (10.3) | 20 (28.1) |  |
| Maintenance |  |  |  |  |  |
| IMiD | 213 (61.7) | 143 (91.1) | 53 (45.3) | 17 (23.9) |  |
| PI | 41 (11.9) | 9 (5.7) | 23 (19.6) | 11 (15.5) |  |
| IMiD + PI | 42 (12.7) | 3 (1.9) | 22 (18.8) | 17 (23.9) |  |
| Anti-CD38-based | 14 (4.0) | 1 (0.6) | 7 (6.0) | 6 (8.4) |  |

ASCT: autologous stem cell transplant; ; Dara: daratumumab; IQR: interquartile range; IMiD: immunomodulatory drugs, HRCA: high-risk cytogenetic abnormalities; PI: proteasome inhibitor; CyBorD: cyclophosphamide, bortezomib, dexamethasone; DaraVD: daratumumab, bortezomib (Velcade), dexamethasone; KRD: carfilzomib (Kyprolis), lenalidomide (Revlimid), dexamethasone; VDPACE: bortezomib (Velcade), dexamethasone, cisPlatin, doxorubicin (Adriamycin), cyclophosphamide, etoposide; VRD: bortezomib, lenalidomide, dexamethasone.
