# Supplementary material for: Cytogenetics-based Clinical Trajectories in Patients with MRD Negativity Post Autologous Transplant for Multiple Myeloma
Source: Research Square preprint supplement (doi:10.21203/rs.3.rs-8586124/v1), 2026-01-20
Supplement: Supplementary file 3 [file 55f9524a193da12edee04db9.docx]

Supplementary Material to ‘**Cytogenetics-based Clinical Trajectories in Patients with MRD Negativity Post Autologous Transplant for Multiple Myeloma’.**

| Table of Content | Page Number |
| --- | --- |
| Supplementary Figure 1. PFS according to MAF translocations | 2 |
| Supplementary Figure 2. OS according to individual HRCAs present versus absent | 3 |
| Supplementary Table 1. Most frequent HRCA combinations among patients with ≥ 2 abnormalities | 4 |


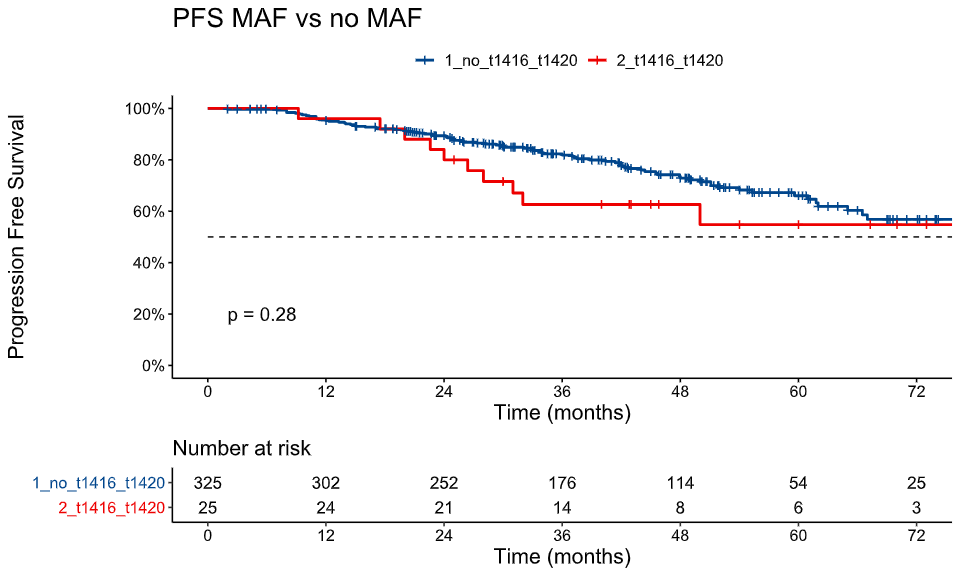


4-year PFS

73%

58%

**A**


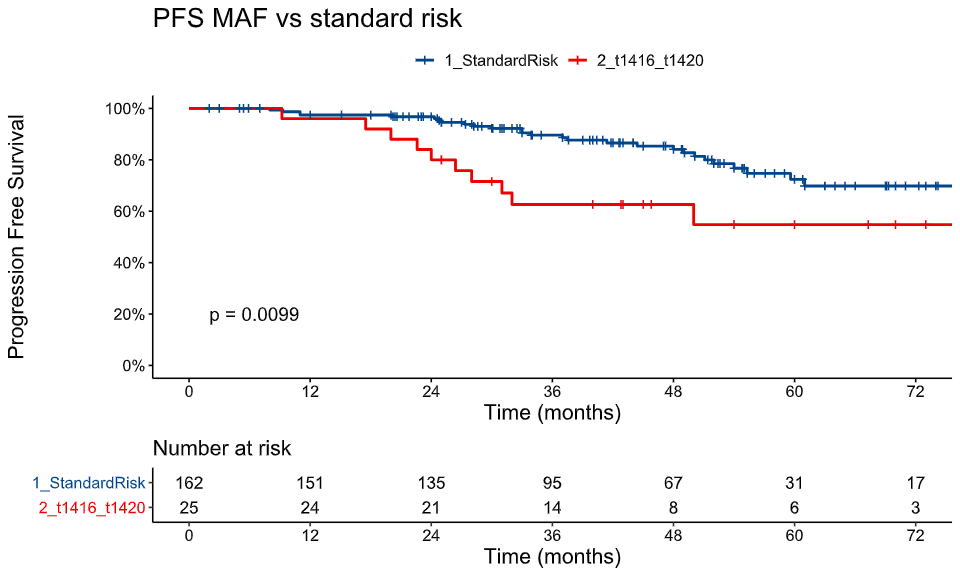


4-year PFS

58%

84%

**B**

**HR 2.51 (95% CI:1.21–5.2)**


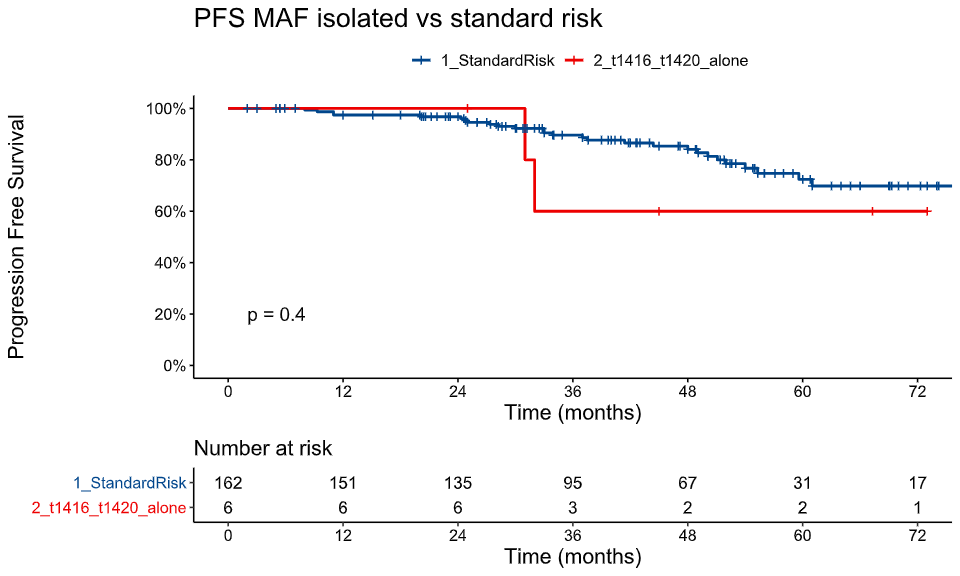


4-year PFS

60%

84%

**C**

**Supplementary Figure 1. PFS according to MAF translocations among MRD-negative patients after ASCT.**

Kaplan–Meier curves depict PFS stratified by the presence of MAF translocations and by comparisons with the standard-risk group.
**(A)** PFS in patients with MAF translocations vs those without MAF translocations.
**(B)** PFS in patients with MAF translocations vs standard-risk disease.
**(C)** PFS in patients with isolated MAF translocations vs standard-risk disease.

Vertical dashed lines indicate 4-year PFS estimates. HRs, 95% CIs, and log-rank p values are shown within each panel; comparisons that did not reach statistical significance do not display HRs. Numbers at risk are displayed below each plot.

PFS, progression-free survival; MRD, measurable residual disease; ASCT, autologous stem cell transplantation; HR, hazard ratio; CI, confidence interval; HRCA, high-risk cytogenetic abnormality.

**
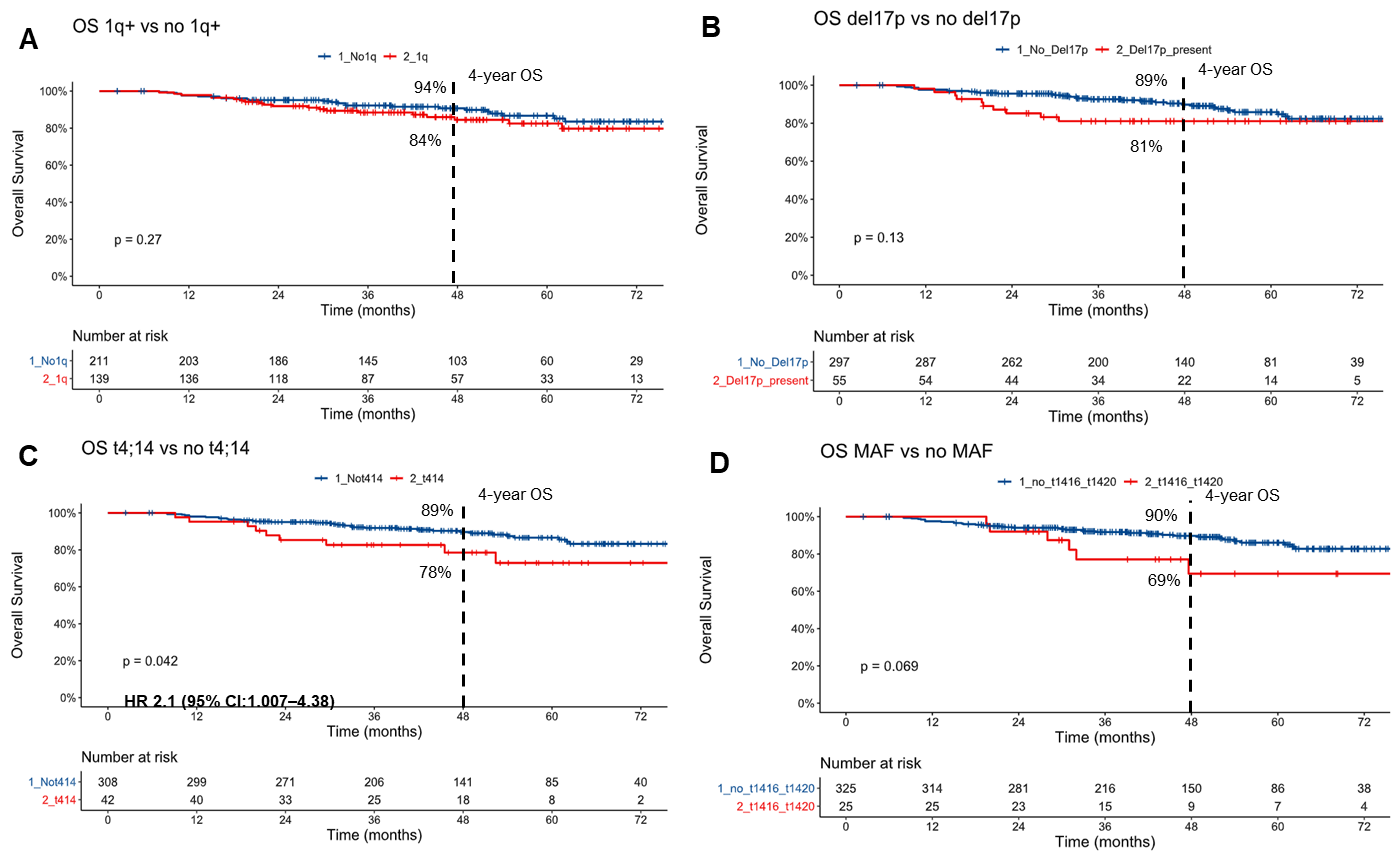
**

### **Supplementary Figure 2. OS according to individual HRCAs present versus absent among MRD-negative patients after ASCT.**

Kaplan–Meier curves depict OS stratified by the presence or absence of individual HRCAs.
**(A)** OS in patients with 1q21+ vs those without 1q21+.
**(B)** OS in patients with del(17p) vs those without del(17p).
**(C)** OS in patients with t(4;14) vs those without t(4;14).
**(D)** OS in patients with MAF translocations vs those without MAF translocations.

Vertical dashed lines indicate 4-year OS estimates. HRs, 95% CIs, and log-rank p values are shown within each panel; comparisons that did not reach statistical significance do not display HRs. Numbers at risk are displayed below each plot.

OS, overall survival; MRD, measurable residual disease; ASCT, autologous stem cell transplantation; HR, hazard ratio; CI, confidence interval; HRCA, high-risk cytogenetic abnormality

**Supplemental Table 1. Most frequent HRCA combinations among patients with ≥ 2 abnormalities (n = 71)**

| Double-hit and triple-hit combinations | n (%) |
| --- | --- |
| 1q21 + t(4;14) | 20 (28.2) |
| del(17p) + 1q21 | 11 (15.5) |
| 1q21 + t(14;16) | 9 (12.7) |
| del(17p) + 1q21 + t(4;14) | 7 (9.9) |
| 1q21 + del(1p) | 6 (8.5) |
| del(17p) + del(1p) | 4 (5.6) |
| 1q21 + t(14;20) | 4 (5.6) |
| del(17p) + t(4;14) | 3 (4.2) |
| del(17p) + 1q21 + t(14;16) | 3 (4.2) |
| del(17p) + t(14;16) | 2 (2.8) |
| del(17p) + 1q21 + del(1p) | 1 (1.4) |
| del(17p) + t(4;14) + t(14;16) | 1 (1.4) |

* Percentages are based on n = 71 double/triple-hit cases.
